# Supplementary material
Source: MDPI journal article supplement (https://www.mdpi.com/2076-3417/13/22/12240)
Supplement: s1 [file s1]

## Supplementary information

### **Black, red and white: characterization of painting materials on a group of Bwa masks from Burkina Faso.**

Clara Granzotto<sup>1</sup>, Ken Sutherland<sup>1\*</sup>

<sup>1</sup>Conservation and Science department, Art Institute of Chicago, Chicago, IL 60603

\*Correspondence: [ksutherland@artic.edu](mailto:ksutherland@artic.edu)

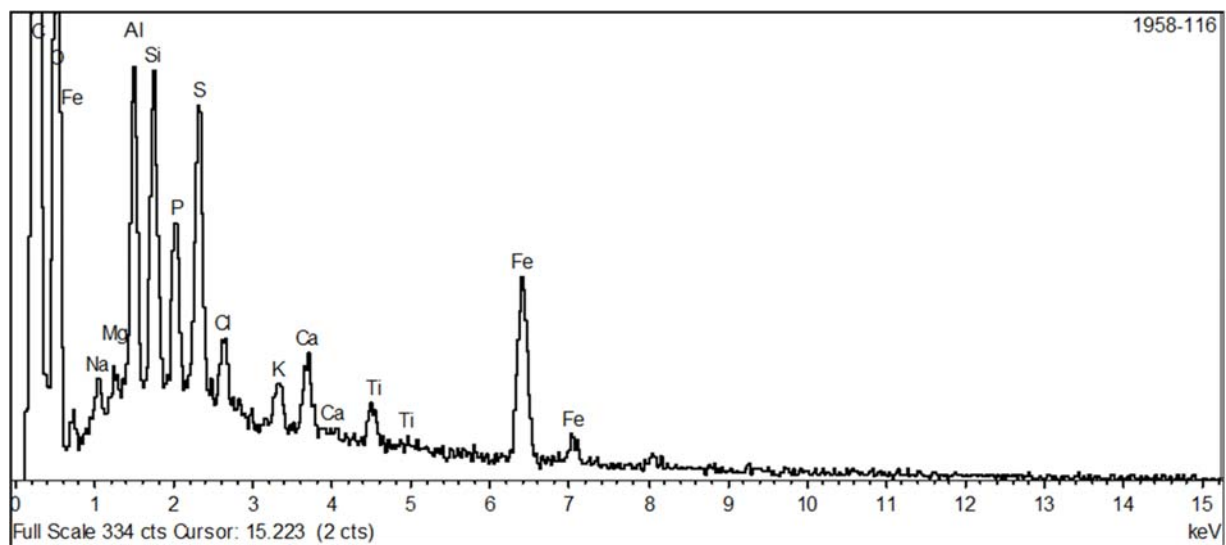

Supplementary Figure S1

EDS spectrum of red paint sample (S5) from the Fish mask (1958.116).

List of proteins identified in a red sample (S5) from Hawk mask (1970.103) and Fish (1958.116): protein name, taxonomy source, number of total and unique peptides, percentage of total and unique sequence coverage, sequence length and total number of identified MS/MS spectra.

[illegible]

|                                                                                      |                                                         |    |    |      |      |      |     |
|--------------------------------------------------------------------------------------|---------------------------------------------------------|----|----|------|------|------|-----|
| <b>Vitellogenin-2</b>                                                                | <i>Numida meleagris</i>                                 | 79 | 31 | 35.7 | 15.4 | 1849 | 310 |
| <b>Vitellogenin-1</b>                                                                | <i>Numida meleagris</i>                                 | 67 | 21 | 30.1 | 8.8  | 1918 | 308 |
| <b>Apolipoprotein B-100</b>                                                          | <i>Numida meleagris</i>                                 | 59 | 7  | 11.1 | 1.2  | 4631 | 129 |
| <b>Ovotransferrin</b>                                                                | <i>Numida meleagris</i>                                 | 56 | 27 | 42   | 23.4 | 1001 | 220 |
| <b>Ovalbumin isoform X</b>                                                           | <i>Numida meleagris</i>                                 | 21 | 7  | 57.3 | 29   | 386  | 121 |
| <b>Ovostatin</b>                                                                     | <i>Numida meleagris</i>                                 | 20 | 10 | 11.1 | 5.6  | 1474 | 38  |
| <b>Vitellogenin-2-like</b>                                                           | <i>Numida meleagris</i>                                 | 18 | 7  | 16.6 | 4.5  | 1720 | 64  |
| <b>Serum albumin</b>                                                                 | <i>Numida meleagris</i>                                 | 17 | 17 | 24   | 24   | 624  | 39  |
| <b>Papilin-like isoform</b>                                                          | <i>Numida meleagris</i>                                 | 14 | 14 | 15.8 | 15.8 | 810  | 25  |
| <b>Mucin-5B</b>                                                                      | <i>Numida meleagris</i> ,<br><i>Meleagris gallopavo</i> | 13 | 13 | 7.2  | 7.2  | 2130 | 22  |
| <b>Lysozyme C</b>                                                                    | <i>Numida meleagris</i>                                 | 12 | 3  | 78.3 | 25.6 | 129  | 59  |
| <b>Vitellogenin-2</b>                                                                | <i>Meleagris gallopavo</i>                              | 12 | 0  | 24.5 | 0    | 1817 | 180 |
| <b>Clusterin</b>                                                                     | <i>Numida meleagris</i>                                 | 11 | 11 | 18.6 | 18.6 | 451  | 27  |
| <b>Serotransferrin precursor</b>                                                     | <i>Meleagris gallopavo</i>                              | 10 | 4  | 27   | 4    | 705  | 89  |
| <b>Ovalbumin-related protein X-like</b>                                              | <i>Numida meleagris</i> , <i>Gallus gallus</i>          | 10 | 3  | 28   | 8.7  | 393  | 44  |
| <b>Vitellogenin-1</b>                                                                | <i>Meleagris gallopavo</i>                              | 9  | 1  | 19.4 | 0.4  | 1913 | 190 |
| <b>Ovomucoid</b>                                                                     | <i>Numida meleagris</i>                                 | 7  | 4  | 39.4 | 28.4 | 208  | 19  |
| <b>Soluble scavenger receptor cysteine-rich domain-containing protein SSC5D-like</b> | <i>Numida meleagris</i>                                 | 6  | 5  | 14.2 | 12.8 | 508  | 10  |
| <b>Hemopexin</b>                                                                     | <i>Numida meleagris</i>                                 | 6  | 4  | 10.3 | 8.5  | 445  | 13  |
| <b>Alpha-1-acid glycoprotein 2-like</b>                                              | <i>Numida meleagris</i>                                 | 6  | 2  | 26.1 | 9.9  | 203  | 14  |
| <b>BPI fold-containing family B member 2 isoform</b>                                 | <i>Numida meleagris</i>                                 | 6  | 3  | 11.6 | 6.2  | 455  | 12  |
| <b>Apolipoprotein A-I</b>                                                            | <i>Numida meleagris</i>                                 | 5  | 5  | 20.5 | 20.5 | 264  | 6   |

|                                                           |                                                  |   |   |      |      |      |    |
|-----------------------------------------------------------|--------------------------------------------------|---|---|------|------|------|----|
| <b>Apolipoprotein B-100</b>                               | <i>Meleagris gallopavo, Gallus gallus</i>        | 5 | 1 | 9    | 0.2  | 4631 | 93 |
| <b>Actin, cytoplasmic type 5</b>                          | Undetermined, compatible <i>Numida meleagris</i> | 4 | 4 | 10.1 | 10.1 | 375  | 5  |
| <b>Ovalbumin isoform X1</b>                               | <i>Meleagris gallopavo</i>                       | 4 | 3 | 28.2 | 5.4  | 386  | 94 |
| <b>Riboflavin-binding protein</b>                         | Undetermined, compatible <i>Numida meleagris</i> | 4 | 1 | 13.4 | 4.2  | 238  | 8  |
| <b>Lysozyme C</b>                                         | <i>Galliformes</i>                               | 3 | 3 | 48.8 | 15.5 | 129  | 27 |
| <b>Apovitellenin-1-like</b>                               | <i>Numida meleagris</i>                          | 3 | 3 | 35.8 | 35.8 | 106  | 28 |
| <b>Ovalbumin-related protein Y</b>                        | <i>Numida meleagris</i>                          | 3 | 3 | 2.8  | 2.8  | 388  | 43 |
| <b>Alpha-2-macroglobulin-like protein 1 isoform X</b>     | <i>Numida meleagris</i>                          | 3 | 3 | 2.8  | 2.8  | 1166 | 5  |
| <b>Beta-microseminoprotein-like</b>                       | <i>Numida meleagris, Meleagris gallopavo</i>     | 3 | 3 | 22.6 | 22.6 | 106  | 6  |
| <b>Extracellular fatty acid-binding protein isoform X</b> | <i>Numida meleagris</i>                          | 3 | 3 | 17   | 17   | 194  | 4  |
| <b>Vitronectin</b>                                        | <i>Aves, compatible Numida meleagris</i>         | 3 | 3 | 7.3  | 7.3  | 449  | 11 |
| <b>Ovalbumin-related protein Y</b>                        | <i>Meleagris gallopavo</i>                       | 3 | 2 | 17.8 | 4.3  | 398  | 24 |
| <b>Elongation factor 1-alpha</b>                          | Undetermined                                     | 2 | 2 | 4.5  | 4.5  | 466  | 2  |
| <b>Histone H2A</b>                                        | Undetermined, compatible <i>Numida meleagris</i> | 2 | 2 | 7.6  | 7.6  | 211  | 2  |
| <b>Ovalbumin, partial</b>                                 | <i>Gallus gallus</i>                             | 2 | 2 | 10.6 | 3.1  | 386  | 13 |
| <b>DNA repair-scaffolding protein-like</b>                | Undetermined                                     | 2 | 2 | 0    | 0    | 193  | 2  |
| <b>Ovohininibitor</b>                                     | <i>Numida meleagris, Meleagris gallopavo</i>     | 2 | 2 | 3    | 3    | 497  | 4  |
| <b>Protein TENP</b>                                       | <i>Meleagris gallopavo</i>                       | 2 | 2 | 7.5  | 5.3  | 455  | 8  |

|                                                            |                                                     |   |   |      |      |      |   |
|------------------------------------------------------------|-----------------------------------------------------|---|---|------|------|------|---|
| <b>Histone-lysine N-methyltransferase ASH1L isoform X1</b> | Undetermined, compatible<br><i>Numida meleagris</i> | 2 | 2 | 0.5  | 0.5  | 3026 | 2 |
| <b>Small basic protein 1-like</b>                          | <i>Numida meleagris</i>                             | 2 | 2 | 29   | 29   | 62   | 5 |
| <b>Cystatin-C</b>                                          | <i>Numida meleagris</i>                             | 2 | 2 | 18.5 | 18.5 | 151  | 7 |

Supplementary Table S2

List of species-diagnostic peptides identified in the red sample (S5) from Hawk (1970.103) and Fish (1958.116) masks: protein name, peptide sequence, species matching on the NCBI database, peptide length and mass, MaxQuant score, and total number of identified MS/MS spectra. Species in parentheses are unlikely according to the geographical origin of the artworks.

| Protein name                           | Sequence                   | BLAST ID                | Length (aa) | Mass      | MQ score | Matched spectra |
|----------------------------------------|----------------------------|-------------------------|-------------|-----------|----------|-----------------|
| <b>Hawk mask (1970.103), sample S5</b> |                            |                         |             |           |          |                 |
| <b>Vitellogenin-2</b>                  | AAVSVDGKMTPLSGDFR          | <i>Numida meleagris</i> | 18          | 1846.9247 | 48.053   | 2               |
|                                        | FLPISSSSASDIPIHIQTDAIMALRK | <i>Numida meleagris</i> | 26          | 2810.5001 | 67.614   | 3               |
|                                        | GSAPDVPMQSYGSLR            | <i>Numida meleagris</i> | 15          | 1563.7351 | 75.695   | 3               |
|                                        | LSQLLASAVQIR               | <i>Numida meleagris</i> | 12          | 1297.7718 | 117.28   | 9               |
|                                        | NERGSAPDVPMQSYGSLR         | <i>Numida meleagris</i> | 18          | 1962.9218 | 47.754   | 1               |
|                                        | SYVEWFYK                   | <i>Numida meleagris</i> | 8           | 1120.5229 | 54.549   | 3               |
|                                        | VGTYFDNYR                  | <i>Numida meleagris</i> | 9           | 1133.5142 | 105.57   | 3               |
|                                        | YHFPAILPQMPLQLIK           | <i>Numida meleagris</i> | 16          | 1908.0695 | 57.136   | 2               |
| <b>Vitellogenin-1</b>                  | AASEENYELMWK               | <i>Numida meleagris</i> | 12          | 1469.6497 | 87.328   | 3               |
|                                        | DNAVSLLEWQR                | <i>Numida meleagris</i> | 11          | 1329.6677 | 163.64   | 3               |
|                                        | LPFTLPLGPSSSSYETR          | <i>Numida meleagris</i> | 17          | 1850.9414 | 119.39   | 5               |
|                                        | STIQNVLQAWYAR              | <i>Numida meleagris</i> | 13          | 1548.8049 | 76.827   | 2               |

|                                         |                             |                         |    |           |        |    |
|-----------------------------------------|-----------------------------|-------------------------|----|-----------|--------|----|
|                                         | VQVVTGSAYTQPCR              | <i>Numida meleagris</i> | 14 | 1564.7668 | 82.362 | 2  |
| <b>Apolipoprotein B-100</b>             | AYTFVADFNNR                 | <i>Numida meleagris</i> | 11 | 1316.6149 | 58.676 | 1  |
|                                         | GIISALLAPAETENIK            | <i>Numida meleagris</i> | 17 | 1767.9618 | 70.488 | 3  |
|                                         | LSDGFTFSIPELHLR             | <i>Numida meleagris</i> | 15 | 1730.8992 | 65.805 | 2  |
|                                         | RGNVAEDISINR                | <i>Numida meleagris</i> | 12 | 1342.6953 | 66.498 | 3  |
|                                         | VELEVPLQCQFVLR              | <i>Numida meleagris</i> | 14 | 1728.9233 | 74.684 | 4  |
| <b>Ovalbumin isoform X</b>              | ELINSWVESQTSGIIK            | <i>Numida meleagris</i> | 16 | 1802.9414 | 79.771 | 4  |
| <b>Clusterin</b>                        | FMEIVAER                    | <i>Numida meleagris</i> | 8  | 993.49535 | 75.109 | 4  |
| <b>Ovotransferrin</b>                   | LCQLCQGLEAFSQEK             | <i>Numida meleagris</i> | 15 | 1809.839  | 75.695 | 12 |
| <b>Vitellogenin-2-like</b>              | FLPTFSLAAVALPSR             | <i>Numida meleagris</i> | 15 | 1588.8977 | 67.153 | 1  |
|                                         | VVTLDQIESLWVR               | <i>Numida meleagris</i> | 13 | 1556.8562 | 75.294 | 1  |
|                                         | YHFPEGLLQMPIALIR            | <i>Numida meleagris</i> | 16 | 1897.0284 | 58.071 | 5  |
| <b>Lysozyme C</b>                       | NLCNIPCSALQSSDITATANC<br>AK | <i>Numida meleagris</i> | 23 | 2508.1407 | 83.395 | 9  |
| <b>Apovitellenin-1-like</b>             | AGQFLMDVSQTAAVAGTR          | <i>Numida meleagris</i> | 18 | 1821.9043 | 133.32 | 24 |
|                                         | LSMLAEQLIEK                 | <i>Numida meleagris</i> | 11 | 1273.6952 | 61.161 | 1  |
|                                         | NFLISETAR                   | <i>Numida meleagris</i> | 9  | 1049.5506 | 182.39 | 12 |
| <b>Ovalbumin-related protein Y</b>      | YNPTNVILFFGR                | <i>Numida meleagris</i> | 12 | 1439.7561 | 175.51 | 5  |
| <b>Alpha-1-acid glycoprotein 2-like</b> | LEEAFVTSNK                  | <i>Numida meleagris</i> | 10 | 1136.5714 | 65.305 | 1  |
| <b>Fish mask (1958.116), sample S5</b>  |                             |                         |    |           |        |    |
| <b>Vitellogenin-2</b>                   | AAVSVDGKMTPLSGDFR           | <i>Numida meleagris</i> | 18 | 1846.9247 | 100.38 | 8  |
|                                         | DAVSFAHSWILEETPCR           | <i>Numida meleagris</i> | 17 | 2016.9364 | 115.14 | 2  |
|                                         | EHFPMQGPDSMPR               | <i>Numida meleagris</i> | 13 | 1527.6599 | 75.088 | 6  |
|                                         | GSAPDVPMQSYGSLR             | <i>Numida meleagris</i> | 15 | 1563.7351 | 96.64  | 4  |
|                                         | IWGHHEIYR                   | <i>Numida meleagris</i> | 9  | 1209.6043 | 85.676 | 2  |
|                                         | KIPGDQVTSTYSSTR             | <i>Numida meleagris</i> | 15 | 1638.8213 | 57.019 | 1  |
|                                         | LSQLLASAVQIR                | <i>Numida meleagris</i> | 12 | 1297.7718 | 75.294 | 3  |

|                             |                              |                         |    |           |        |    |
|-----------------------------|------------------------------|-------------------------|----|-----------|--------|----|
|                             | NCQDYRVSTELVTGR              | <i>Numida meleagris</i> | 15 | 1796.8475 | 69.979 | 3  |
|                             | NERGSAPDVPMQSYGSLR           | <i>Numida meleagris</i> | 18 | 1962.9218 | 84.94  | 6  |
|                             | QHLTLLEVRNER                 | <i>Numida meleagris</i> | 12 | 1506.8267 | 105.4  | 5  |
|                             | RSSDASFIKNTYLHR              | <i>Numida meleagris</i> | 15 | 1793.9173 | 59.673 | 4  |
|                             | RTHKQDICK                    | <i>Numida meleagris</i> | 10 | 1297.6925 | 64.439 | 1  |
|                             | TIAEPADRNTALK                | <i>Numida meleagris</i> | 13 | 1398.7467 | 130.98 | 6  |
|                             | TIAEPADRNTALKR               | <i>Numida meleagris</i> | 14 | 1554.8478 | 87.498 | 9  |
|                             | TRMPVKFDAK                   | <i>Numida meleagris</i> | 10 | 1191.6434 | 67.993 | 2  |
|                             | VGTYFDNYR                    | <i>Numida meleagris</i> | 9  | 1133.5142 | 144.38 | 5  |
|                             | YVIQEDRRNGR                  | <i>Numida meleagris</i> | 11 | 1404.7222 | 67.169 | 2  |
| <b>Vitellogenin-1</b>       | AASEENYELMWK                 | <i>Numida meleagris</i> | 12 | 1469.6497 | 108.98 | 5  |
|                             | ALLPSEIRR                    | <i>Numida meleagris</i> | 9  | 1053.6295 | 102.41 | 2  |
|                             | DNAVSLLEWQR                  | <i>Numida meleagris</i> | 11 | 1329.6677 | 77.677 | 2  |
|                             | SKVEISCIGPK                  | <i>Numida meleagris</i> | 11 | 1216.6486 | 84.17  | 2  |
|                             | VEISCIGPK                    | <i>Numida meleagris</i> | 9  | 1001.5216 | 83.265 | 2  |
|                             | VQVVTGSAYTQPCR               | <i>Numida meleagris</i> | 14 | 1564.7668 | 179.67 | 10 |
|                             | YILDLLPAAANHR                | <i>Numida meleagris</i> | 13 | 1465.8041 | 92.062 | 2  |
| <b>Apolipoprotein B-100</b> | AYTFVADFNNR                  | <i>Numida meleagris</i> | 11 | 1316.6149 | 92.062 | 2  |
|                             | RGNVAEDISINR                 | <i>Numida meleagris</i> | 12 | 1342.6953 | 171.92 | 8  |
| <b>Ovotransferrin</b>       | AHVMDYREC�LAEPHTAV<br>VVRPEK | <i>Numida meleagris</i> | 25 | 2919.4484 | 113.54 | 3  |
|                             | AQSDFGVGTK                   | <i>Numida meleagris</i> | 10 | 1008.4876 | 114.89 | 7  |
|                             | CNSLRDLTQQR                  | <i>Numida meleagris</i> | 12 | 1518.7209 | 149.23 | 12 |
|                             | CVASSHERYFGYTALR             | <i>Numida meleagris</i> | 17 | 1972.9214 | 77.562 | 1  |
|                             | FMMFESQIK                    | <i>Numida meleagris</i> | 9  | 1159.5406 | 51.059 | 2  |
|                             | GSDVTWNNLK                   | <i>Numida meleagris</i> | 10 | 1132.5513 | 60.118 | 2  |
|                             | GSDVTWNNLK GK                | <i>Numida meleagris</i> | 12 | 1317.6677 | 82.287 | 3  |

|                                |                     |                                                             |    |           |        |   |
|--------------------------------|---------------------|-------------------------------------------------------------|----|-----------|--------|---|
|                                | IRELLEIQEK          | <i>Numida meleagris</i>                                     | 10 | 1269.7293 | 160.36 | 6 |
|                                | IRELLEIQEKR         | <i>Numida meleagris</i>                                     | 11 | 1425.8304 | 114.83 | 3 |
|                                | KCNSLRDLTQQR        | <i>Numida meleagris</i>                                     | 13 | 1646.8159 | 67.456 | 5 |
|                                | KGSDVTWNNLK         | <i>Numida meleagris</i>                                     | 11 | 1260.6463 | 64.792 | 1 |
|                                | KGSDVTWNNLK GK      | <i>Numida meleagris</i>                                     | 13 | 1445.7627 | 167.6  | 4 |
|                                | LCQLCQGLEAFS QEK    | <i>Numida meleagris</i>                                     | 15 | 1809.839  | 83.045 | 5 |
|                                | SKFMMFESQIK         | <i>Numida meleagris</i>                                     | 11 | 1374.6676 | 59.908 | 1 |
|                                | WSVASNGDV ECTVAAEAK | <i>Numida meleagris</i>                                     | 18 | 1892.8574 | 67.997 | 1 |
| <b>Ovalbumin isoform X2/X1</b> | ELINSWVESQTSGIIK    | <i>Numida meleagris</i>                                     | 16 | 1802.9414 | 69.01  | 1 |
|                                | VDHPFLLCIK          | <i>Numida meleagris</i>                                     | 10 | 1240.6638 | 84.743 | 2 |
|                                | VTEQESKPVQMMSQIGSFK | <i>Numida meleagris</i>                                     | 19 | 2153.0497 | 48.288 | 1 |
| <b>Ovostatin</b>               | AEICETFLR           | <i>Numida meleagris</i>                                     | 9  | 1137.5488 | 98.523 | 2 |
|                                | ELVADSARLPIEK       | <i>Numida meleagris</i>                                     | 13 | 1439.7984 | 84.687 | 2 |
|                                | GTTFHLEER           | <i>Numida meleagris</i>                                     | 9  | 1088.5251 | 66.621 | 1 |
| <b>Vitellogenin-2-like</b>     | HNLEPVFR            | <i>Numida meleagris</i>                                     | 8  | 1010.5298 | 101.28 | 3 |
|                                | SRVEDMALALK         | <i>Numida meleagris</i>                                     | 11 | 1231.6595 | 77.662 | 2 |
| <b>Serum albumin</b>           | CAANEDAPECTK        | <i>Numida meleagris</i> , ( <i>Psophia crepitans</i> )      | 12 | 1364.5337 | 55.567 | 1 |
|                                | IFQADKLAR           | <i>Numida meleagris</i> , ( <i>Nothoprocta pentlandii</i> ) | 9  | 1060.6029 | 133.6  | 1 |
| <b>Papilin-like isoform</b>    | CCNTGCAWACVAVPR     | <i>Numida meleagris</i>                                     | 15 | 1780.7266 | 136.33 | 3 |
|                                | DVAVVPQHSAGR        | <i>Numida meleagris</i>                                     | 12 | 1234.6418 | 54.416 | 1 |
|                                | GKEGACPIPR          | <i>Numida meleagris</i>                                     | 10 | 1083.5495 | 52.482 | 2 |
|                                | GSGTCLDLCSSSK       | <i>Numida meleagris</i>                                     | 13 | 1370.5806 | 52.391 | 3 |
|                                | NQCLDDSVCGR         | <i>Numida meleagris</i>                                     | 11 | 1322.5343 | 53.751 | 1 |
|                                | NQCLDDSVCGRDEK      | <i>Numida meleagris</i>                                     | 14 | 1694.6988 | 60.196 | 1 |
|                                | VCVAPEPDKPGR        | <i>Numida meleagris</i>                                     | 12 | 1323.6605 | 68.735 | 4 |
|                                | VCVAPEPDKPGRCPK     | <i>Numida meleagris</i>                                     | 15 | 1708.8389 | 40.025 | 1 |

|                                         |                                   |                                                                                                                                                               |    |           |        |   |
|-----------------------------------------|-----------------------------------|---------------------------------------------------------------------------------------------------------------------------------------------------------------|----|-----------|--------|---|
|                                         | YDADCPGEER                        | <i>Numida meleagris</i>                                                                                                                                       | 10 | 1210.4561 | 57.59  | 1 |
| <b>Mucin-5B</b>                         | CGNAFCGPNGVHK                     | <i>Meleagris gallopavo, Numida meleagris, (Lagopus muta, Tympanuchus pallidicinctus, Lagopus leucura, Centrocercus urophasianus, Odontophorus gujanensis)</i> | 14 | 1505.7119 | 44.882 | 2 |
| <b>Lysozyme C</b>                       | GTDVRVWIK                         | <i>Numida meleagris</i>                                                                                                                                       | 9  | 1072.6029 | 46.462 | 1 |
|                                         | NLCNIPCSALQSSDITATANCAKK          | <i>Numida meleagris</i>                                                                                                                                       | 24 | 2636.2357 | 77.045 | 1 |
| <b>Vitellogenin-2</b>                   | RTSILPGDAPLK                      | <i>Meleagris gallopavo, (Tympanuchus pallidicinctus, Lagopus leucura, Lagopus muta)</i>                                                                       | 12 | 1266.7296 | 79.974 | 2 |
|                                         | TSILPGDAPLK                       | <i>Meleagris gallopavo, (Tympanuchus pallidicinctus, Lagopus leucura, Lagopus muta)</i>                                                                       | 11 | 1110.6285 | 62.558 | 2 |
| <b>Clusterin</b>                        | FMEIVAER                          | <i>Numida meleagris</i>                                                                                                                                       | 8  | 993.49535 | 84.568 | 3 |
| <b>Serotransferrin precursor</b>        | ISELLEKQEK                        | <i>Meleagris gallopavo</i>                                                                                                                                    | 10 | 1215.6711 | 76.17  | 1 |
|                                         | ITLTCLQK                          | <i>Meleagris gallopavo</i>                                                                                                                                    | 8  | 975.5423  | 145.04 | 2 |
|                                         | WCTISPLEEK                        | <i>Meleagris gallopavo</i>                                                                                                                                    | 10 | 1261.6013 | 85.862 | 3 |
| <b>Ovalbumin-related protein X-like</b> | SRPILPIYLK                        | <i>Numida meleagris, Gallus gallus, (Anser cygnoides, Bambusicola thoracicus)</i>                                                                             | 10 | 1198.7438 | 96.331 | 3 |
| <b>Vitellogenin-1</b>                   | IAALATTGQLAR                      | <i>Meleagris gallopavo, (Lagopus leucura, Phasianus colchicus, Coturnix japonica, Lagopus muta, Centrocercus urophasianus)</i>                                | 12 | 1184.6877 | 166.09 | 4 |
| <b>Ovomucoid</b>                        | AFNPVCGTDGVTYDNECLLCAHNVEQGTSVGKK | <i>Numida meleagris</i>                                                                                                                                       | 33 | 3639.6392 | 103.07 | 1 |
|                                         | EAVPVDCSRYPNMTSEEGK               | <i>Numida meleagris</i>                                                                                                                                       | 19 | 2167.9514 | 44.468 | 1 |

|                                                                                      |                      |                                                                                                                                                                                                             |    |           |        |   |
|--------------------------------------------------------------------------------------|----------------------|-------------------------------------------------------------------------------------------------------------------------------------------------------------------------------------------------------------|----|-----------|--------|---|
| <b>Soluble scavenger receptor cysteine-rich domain-containing protein SSC5D-like</b> | QVGCGSPLSAVGGAR      | <i>Numida meleagris</i> ,<br>( <i>Odontophorus gujanensis</i> ,<br><i>Colinus virginianus</i> )                                                                                                             | 15 | 1414.6987 | 124.42 | 2 |
| <b>Hemopexin</b>                                                                     | TGEVPLGYPR           | <i>Numida meleagris</i>                                                                                                                                                                                     | 10 | 1087.5662 | 107.9  | 2 |
| <b>Alpha-1-acid glycoprotein 2-like</b>                                              | LEEAFVTSNK           | <i>Numida meleagris</i>                                                                                                                                                                                     | 10 | 1136.5714 | 55.461 | 1 |
|                                                                                      | LEEAFVTSNKDACPAAGEER | <i>Numida meleagris</i>                                                                                                                                                                                     | 20 | 2193.0008 | 99.059 | 4 |
| <b>BPI fold-containing family B member 2 isoform</b>                                 | LLTSACRPTVR          | <i>Numida meleagris</i>                                                                                                                                                                                     | 11 | 1272.6972 | 85.958 | 2 |
| <b>Apolipoprotein A-I</b>                                                            | VTPLLQEFKER          | <i>Numida meleagris</i>                                                                                                                                                                                     | 11 | 1358.7558 | 41.283 | 1 |
| <b>Apolipoprotein B-100</b>                                                          | GSVAEDISINR          | <i>Gallus gallus</i> , <i>Meleagris gallopavo</i> , ( <i>Centrocercus urophasianus</i> , <i>Lagopus leucura</i> , <i>Lagopus muta</i> , <i>Tympanuchus pallidicinctus</i> , <i>Bambusicola thoracicus</i> ) | 11 | 1159.5833 | 81.338 | 2 |
|                                                                                      | RGSVAEDISINR         | <i>Gallus gallus</i> , <i>Meleagris gallopavo</i> , ( <i>Centrocercus urophasianus</i> , <i>Lagopus leucura</i> , <i>Lagopus muta</i> , <i>Tympanuchus pallidicinctus</i> , <i>Bambusicola thoracicus</i> ) | 12 | 1315.6844 | 88.338 | 2 |
| <b>Ovalbumin isoform X1</b>                                                          | MTEWISSNIMEER        | <i>Meleagris gallopavo</i>                                                                                                                                                                                  | 13 | 1624.7225 | 96.342 | 3 |
| <b>Apovitellenin-1-like</b>                                                          | LSMLAEQLIEK          | <i>Numida meleagris</i>                                                                                                                                                                                     | 11 | 1273.6952 | 127.76 | 5 |
|                                                                                      | NFLISETAR            | <i>Numida meleagris</i>                                                                                                                                                                                     | 9  | 1049.5506 | 143.61 | 6 |
| <b>Ovalbumin-related protein Y</b>                                                   | SNATYSLEIAEK         | <i>Numida meleagris</i>                                                                                                                                                                                     | 12 | 1324.6511 | 48.004 | 1 |
|                                                                                      | TAFNTEDTR            | <i>Numida meleagris</i>                                                                                                                                                                                     | 9  | 1053.4727 | 150.4  | 6 |
| <b>Alpha-2-macroglobulin-like protein 1 isoform X2/X1</b>                            | EIAVTNLKPGYVR        | <i>Numida meleagris</i>                                                                                                                                                                                     | 13 | 1458.8195 | 127.3  | 3 |

|                                                               |                   |                                                                   |    |           |        |   |
|---------------------------------------------------------------|-------------------|-------------------------------------------------------------------|----|-----------|--------|---|
| <b>Beta-microseminoprotein-like</b>                           | YGCISNR           | <i>Numida meleagris, Meleagris gallopavo, (Coturnix japonica)</i> | 7  | 868.38614 | 89.427 | 3 |
| <b>extracellular fatty acid-binding protein isoform X1/X2</b> | MVEVLDTDYK        | <i>Numida meleagris</i>                                           | 10 | 1211.5744 | 55.567 | 1 |
|                                                               | SREVDPA AAAIFRK   | <i>Numida meleagris</i>                                           | 14 | 1529.8314 | 57.034 | 1 |
| <b>Ovalbumin-related protein Y</b>                            | TINFENLR          | <i>Meleagris gallopavo</i>                                        | 8  | 1005.5243 | 77.741 | 2 |
| <b>Ovalbumin, partial</b>                                     | DSTR TQIDK VVR    | <i>Gallus gallus</i>                                              | 12 | 1416.7685 | 59.898 | 1 |
|                                                               | TQIDK VVR         | <i>Gallus gallus</i>                                              | 8  | 957.56073 | 166.17 | 3 |
| <b>Ovohinibitor</b>                                           | HITIDCTR          | <i>Numida meleagris, Meleagris gallopavo</i>                      | 8  | 1014.4917 | 98.299 | 2 |
| <b>Protein TENP</b>                                           | EGVHLPHPSR        | <i>Meleagris gallopavo</i>                                        | 10 | 1127.5836 | 47.198 | 1 |
| <b>Small basic protein 1-like</b>                             | AYCCLPPLK         | <i>Numida meleagris</i>                                           | 9  | 1120.5409 | 58.194 | 4 |
|                                                               | GYCSSVCEK         | <i>Numida meleagris</i>                                           | 9  | 1088.4267 | 69.423 | 1 |
| <b>Cystatin-C</b>                                             | LLGAPVPVNENDEGLQR | <i>Numida meleagris</i>                                           | 17 | 1819.9428 | 100.72 | 4 |

Supplementary Table S3

List of proteins identified in the white sample (S3) from the Fish mask (1958.116): protein name, taxonomy source, number of total and unique peptides, percentage of total and unique sequence coverage, sequence length and total number of identified MS/MS spectra.

| Protein name                               | Taxonomic source                                 | Total peptides | Unique peptides | Tot sequence coverage (%) | Unique sequence coverage (%) | Sequence length | MSMS spectra |
|--------------------------------------------|--------------------------------------------------|----------------|-----------------|---------------------------|------------------------------|-----------------|--------------|
| <b>Lysozyme</b>                            | <i>Pogona vitticeps</i>                          | 5              | 5               | 23.6                      | 23.6                         | 148             | 17           |
| <b>Actin, cytoplasmic 1</b>                | Undetermined, compatible <i>Pogona vitticeps</i> | 5              | 2               | 15.2                      | 5.6                          | 375             | 8            |
| <b>Desmoplakin</b>                         | Undetermined, compatible <i>Pogona vitticeps</i> | 3              | 3               | 1                         | 1                            | 2879            | 4            |
| <b>Histone H4</b>                          | Undetermined, compatible <i>Pogona vitticeps</i> | 3              | 3               | 29.1                      | 29.1                         | 103             | 4            |
| <b>A.superbus venom factor 1-like</b>      | <i>Pogona vitticeps</i>                          | 2              | 2               | 1.6                       | 1.6                          | 1654            | 2            |
| <b>Histone H2B</b>                         | Undetermined, compatible <i>Pogona vitticeps</i> | 2              | 2               | 15.9                      | 15.9                         | 126             | 2            |
| <b>Ubiquitin-60S ribosomal protein L40</b> | Undetermined, compatible <i>Pogona vitticeps</i> | 2              | 2               | 19.5                      | 19.5                         | 128             | 2            |
| <b>Tubulin alpha chain</b>                 | Undetermined, compatible <i>Pogona vitticeps</i> | 2              | 2               | 5.3                       | 5.3                          | 451             | 2            |
| <b>Alpha-enolase</b>                       | Undetermined, compatible <i>Pogona vitticeps</i> | 2              | 2               | 7                         | 7                            | 342             | 2            |

Supplementary Table S4

List of species-diagnostic peptides identified in the white sample (S3) from the Fish mask (1958.116): protein name, peptide sequence, species matching on the NCBI database, peptide length and mass, MaxQuant score, and total number of identified MS/MS spectra.

| Protein name                          | Sequence       | BLAST ID                | Length (aa) | Mass      | MQ score | Matched spectra |
|---------------------------------------|----------------|-------------------------|-------------|-----------|----------|-----------------|
| <b>Lysozyme</b>                       | MDAWVAWVNCK    | <i>Pogona vitticeps</i> | 12          | 1492.6591 | 99.802   | 3               |
| <b>A.superbus venom factor 1-like</b> | IPIVEGEGEAVLTR | <i>Pogona vitticeps</i> | 14          | 1481.809  | 73.781   | 1               |
